# Supplementary material for: Chemical Diversity of Locked Nucleic Acid-Modified Antisense Oligonucleotides Allows Optimization of Pharmaceutical Properties
Source: PubMed Central journal article supplement (PMC6965521; doi:10.1016/j.omtn.2019.12.011), 2019-12-18
Supplement: mmc1.pdf [file mmc1.pdf]

**OMTN, Volume 19**

**Supplemental Information**

**Chemical Diversity of Locked Nucleic**

**Acid-Modified Antisense Oligonucleotides**

**Allows Optimization of Pharmaceutical Properties**

**Natalia Papargyri, Malene Pontoppidan, Mikael R. Andersen, Troels Koch, and Peter H. Hagedorn**

## SUPPLEMENTARY FIGURES

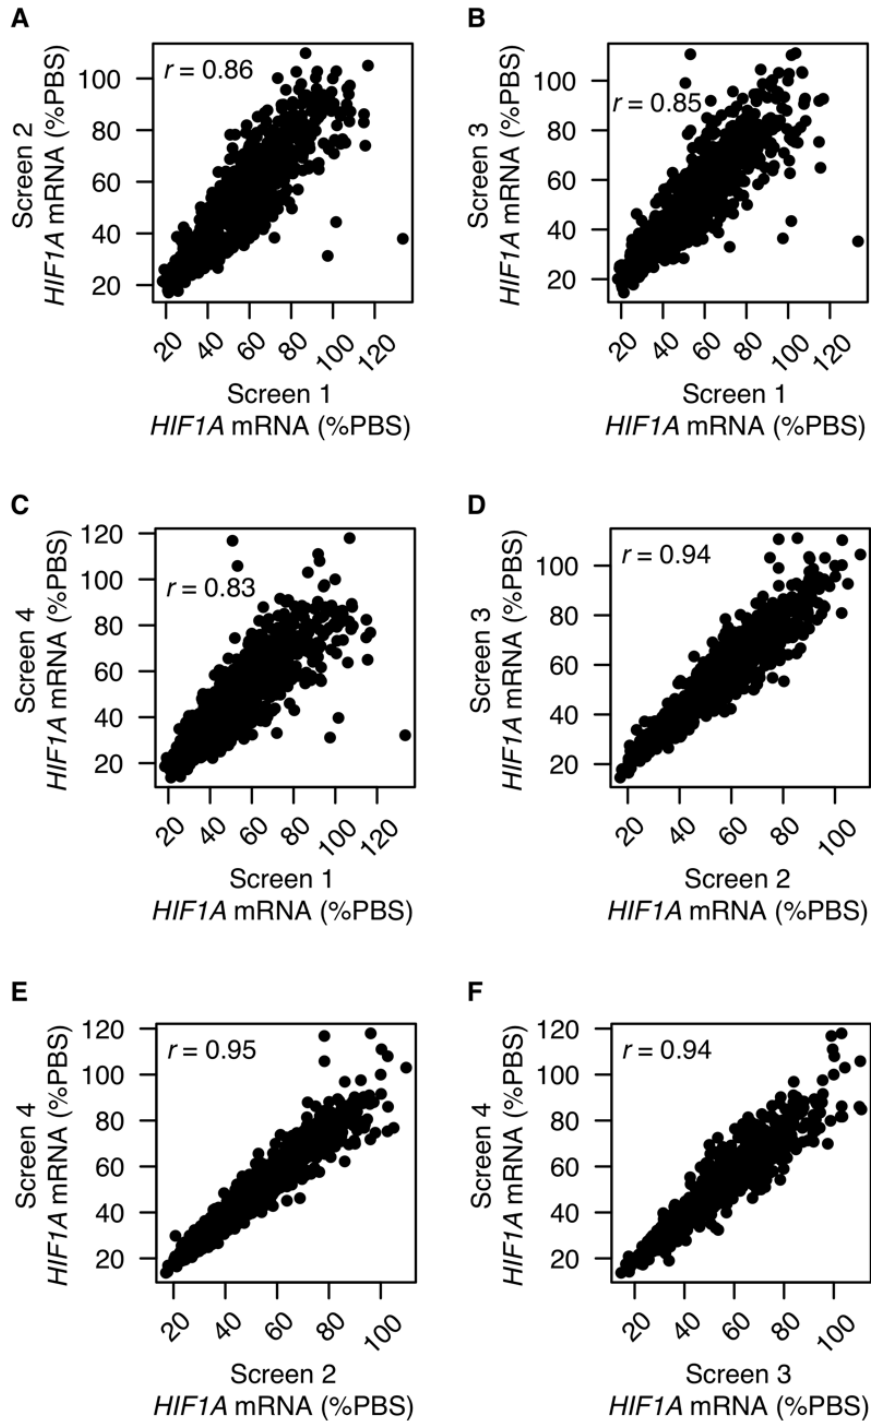

**Figure S1.** Reproducible knockdown of HIF1A mRNA across four biological replicate screens. All 768 LNA-gamers evaluated in this study are shown. HeLa cells were treated for three days at a concentration of 5  $\mu\text{M}$  by unassisted uptake and mRNA evaluated by RT-qPCR **A**) Screen 1 vs screen 2. **B**) Screen 1 vs screen 3. **C**) Screen 1 vs screen 4. **D**) Screen 2 vs screen 3. **E**) Screen 2 vs screen 4. **F**) Screen 3 vs screen 4. For all scatterplots,  $r$  indicates Pearson's correlation.

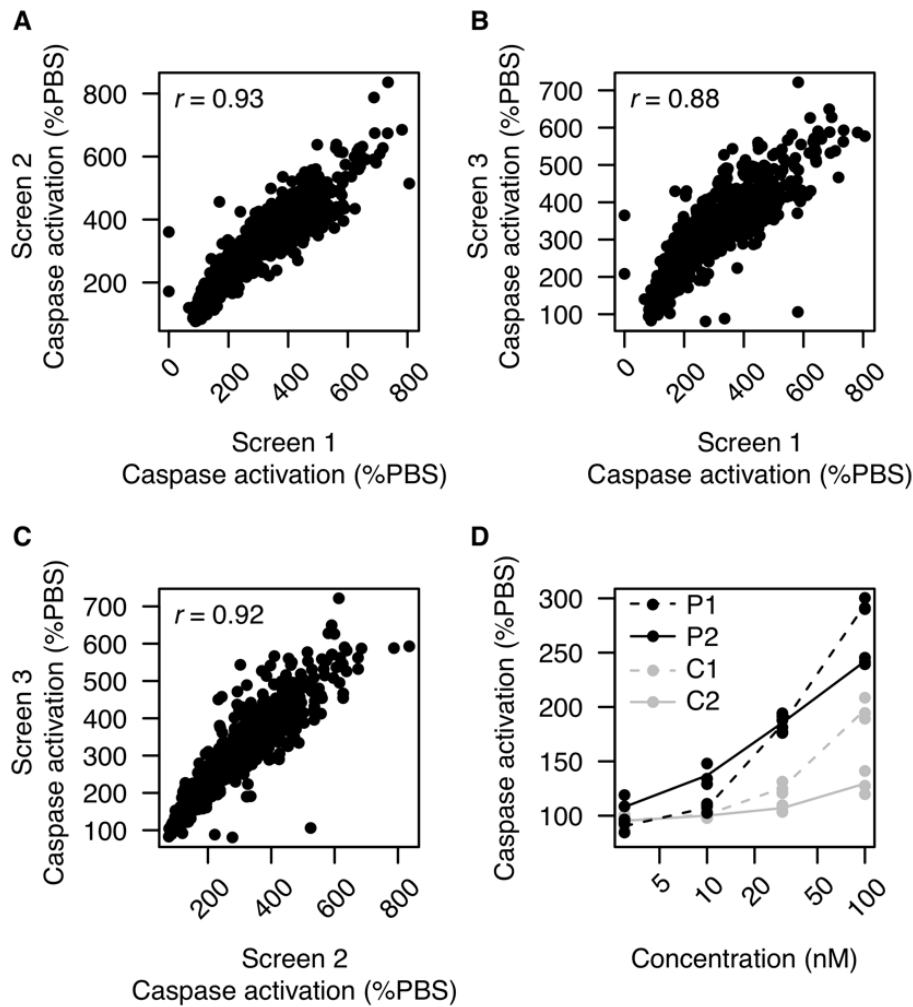

**Figure S2.** Reproducible knockdown of caspase activation across three biological replicate screens and evaluation of concentration dependence. **A)** Screen 1 vs screen 2. **B)** Screen 1 vs screen 3. **C)** Screen 2 vs screen 3. For all scatterplots ABC,  $r$  indicates Pearson's correlation, and all 768 LNA-gampers evaluated in this study 24h after transfection of 100 nM in HeLa cells are shown. **D)** Evaluation of caspase activation of two positive control gampers targeting *HIF1A* and known to knock down *HIF1A* mRNA, P1 and P2, and two negative control gampers not targeting *HIF1A* and expected to be well-tolerated in cells C1 and C2, see Supplementary Table 1. Four concentrations tested 3, 10, 30 and 100nM. Points indicate individual measurements ( $n=3$ ) and lines indicate average values.

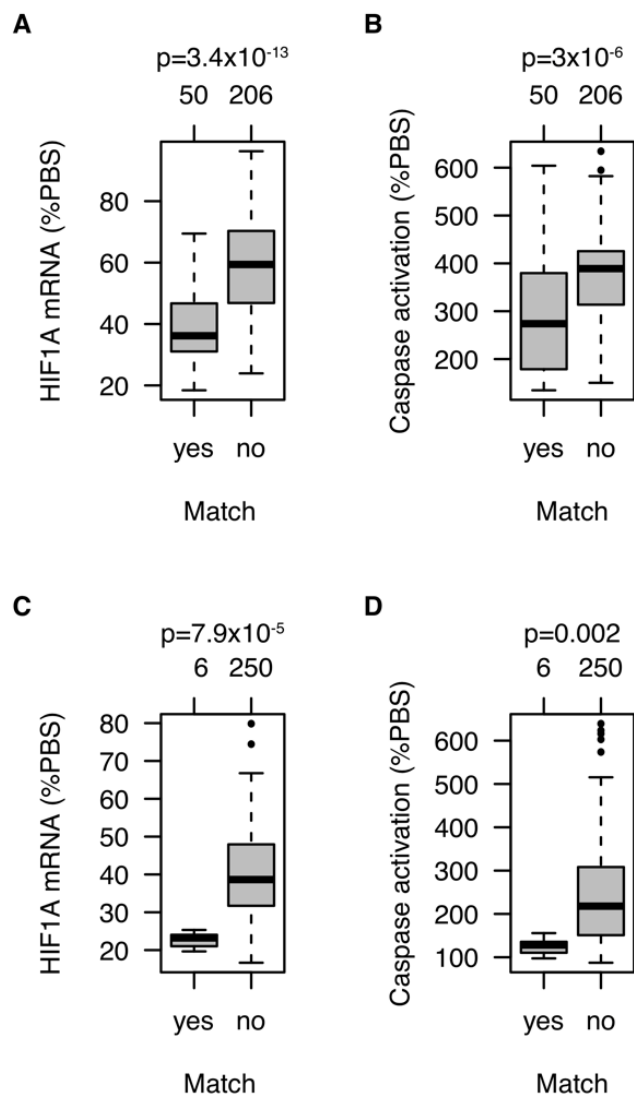

**Figure S3. Preferred chemical modification architectures.** **A)** For region A, boxplots of gapmers matching the preferred criteria ( $n=50$  gapmers) with respect to knockdown activity and **B)** cytotoxic potential versus gapmers not matching those criteria ( $n=206$ ). **C)** For region B, boxplots of gapmers matching the preferred criteria ( $n=6$  gapmers) with respect to knockdown activity and **D)** cytotoxic potential versus gapmers not matching those criteria ( $n=250$ ). Significance evaluated by two-sided Wilcoxon rank sum test.

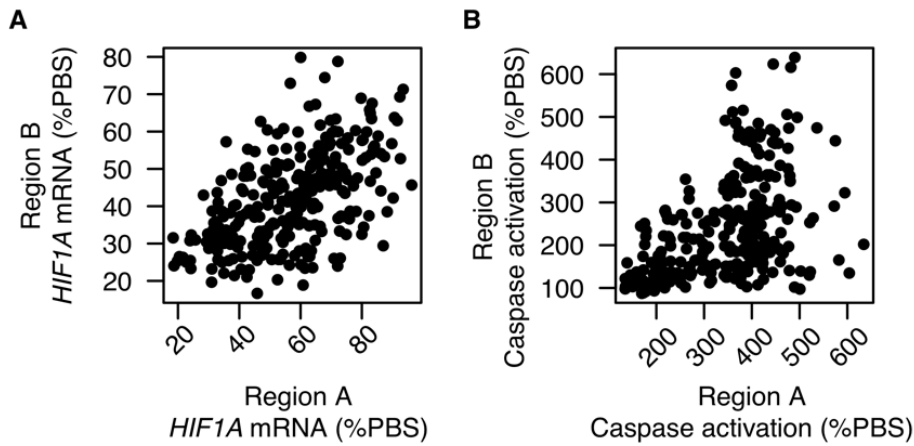

**Figure S4.** Comparison of modification architectures between region A and B. **A)** Knockdown activity. **B)** Cytotoxic potential.

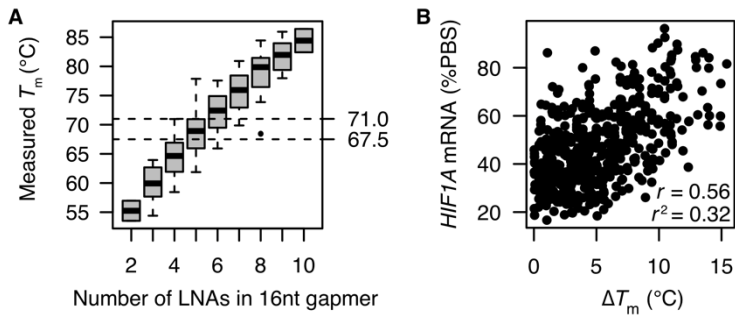

**Figure S5.** Impact of LNAs on  $T_m$ , and  $T_m$  on knockdown activities. **A)** Boxplots of  $T_m$  for 16nt gapmers as a function of the number of LNAs in each gapmer. Dashed lines indicate optimal  $T_m$  for regions A and B. **B)** Scatterplot of  $\Delta T_m$  (absolute difference between gapmer  $T_m$  and optimal  $T_m$  in target region) versus knockdown activity.  $r$  indicates Pearson's correlation.  $r^2$  indicates coefficient of determination.

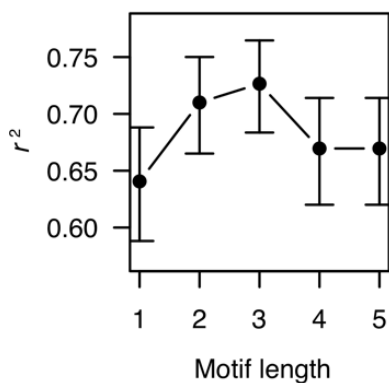

**Figure S6.** Proportion of variance explained of knockdown activity of 16nt gapmers by robust linear model as a function of gap motif length in nt. Error bars indicate 95% confidence intervals.

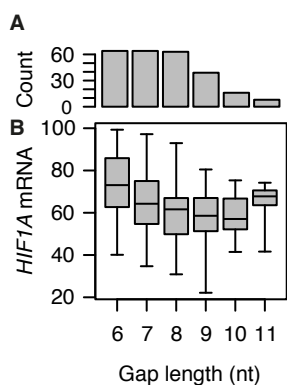

**Figure S7.** Measured and predicted knockdown activities for 13nt gapmers stratified by gap sizes. **A)** Barplot showing number of 13nt gapmers with gap sizes from 6 to 11nt. **B)** Boxplots of measured knockdown activities of *HIF1A* mRNA (%PBS) for 13nt gapmers stratified by gap size.
